# Supplementary figures and images for: Electrocatalytically functional multilayer assembly of sulfite oxidase and cytochrome c
Source: Royal Society of Chemistry journal article supplement (doi:10.1039/b717694e), 2008-01-01

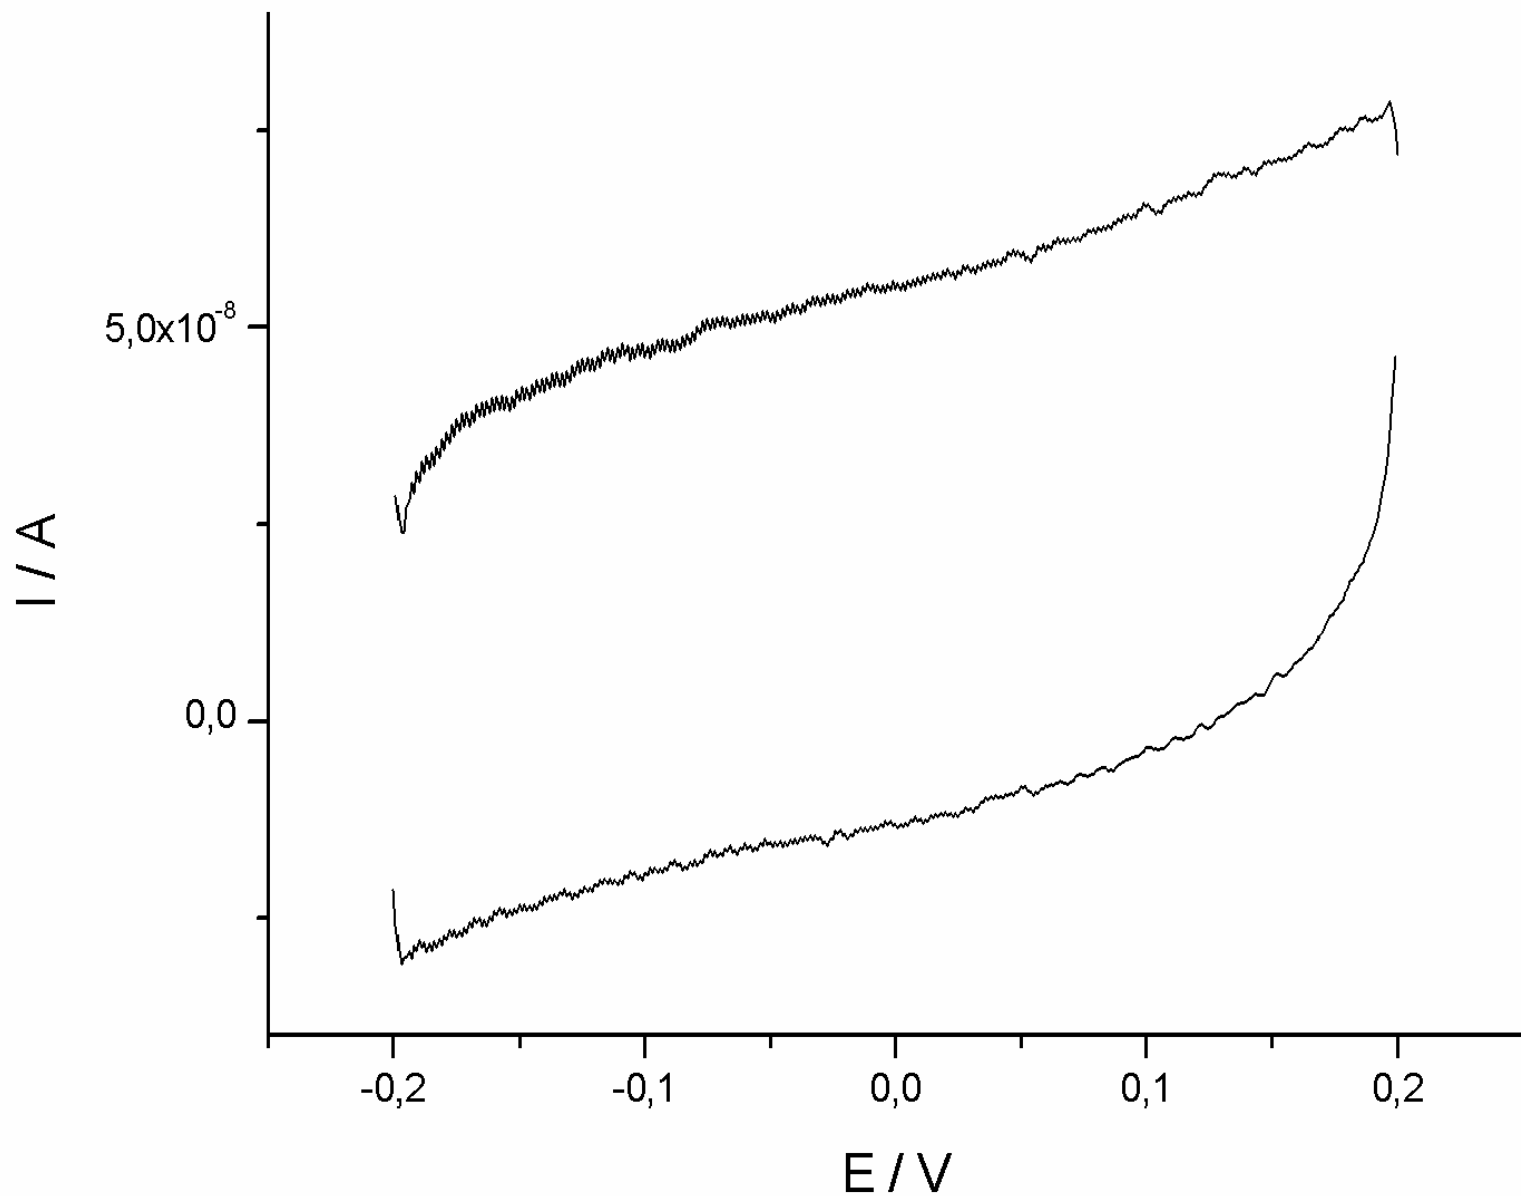

**Fig. S1** CV of  $0.2 \text{ mg mL}^{-1}$  PASA in  $5 \text{ mM Tris}$ ,  $2 \text{ mM KCl}$  pH  $8.5$  on Au-Mu/MuA. at  $0.1 \text{ V s}^{-1}$ .

Supplement: b717694e.pdf [file b717694e.pdf]
